# Supplementary material
Source: Springer Nature journal article supplement (https://www.springermedizin.de/resource/supplementary/12950_2013_351_MOESM4_ESM.pdf/9557682)

# I $\kappa$ B $\alpha$

Log<sub>10</sub> ratios compared to Poly I:C

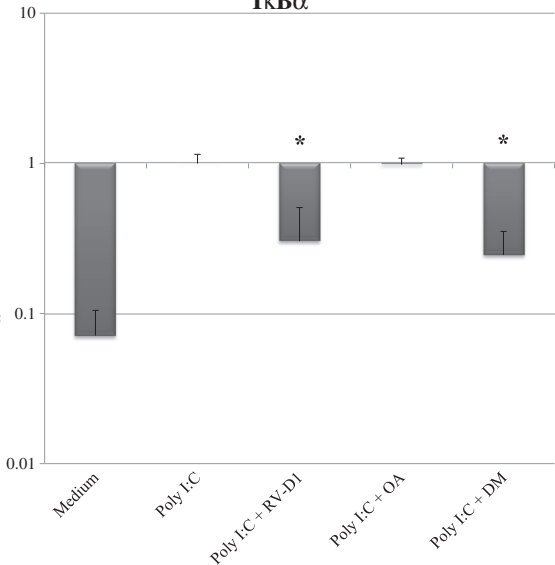

Supplement: MOESM4 [file 9557682]
